# Supplementary material for: Detecting SARS-CoV-2 Variants in Wastewater and Their Correlation With Circulating Variants in the Communities
Source: Res Sq. 2022 Mar 17:rs.3.rs-1435729. Preprint. [Version 1] doi: 10.21203/rs.3.rs-1435729/v1 (PMC8936115; doi:10.21203/rs.3.rs-1435729/v1)
Supplement: 2 [file a25ad61ba08116b36da5722e.xlsx]

## Sheet: Table S1
Table S1: GISAID Accession Numbers
EPI_ISL_1135856
EPI_ISL_1135857
EPI_ISL_1135860
EPI_ISL_1135861
EPI_ISL_1135862
EPI_ISL_1135864
EPI_ISL_1135865
EPI_ISL_1135868
EPI_ISL_1135870
EPI_ISL_1135871
EPI_ISL_1135873
EPI_ISL_1135874
EPI_ISL_1135875
EPI_ISL_1135876
EPI_ISL_1135883
EPI_ISL_1135884
EPI_ISL_1135887
EPI_ISL_1135888
EPI_ISL_1135889
EPI_ISL_1135891
EPI_ISL_1135892
EPI_ISL_1135894
EPI_ISL_1135898
EPI_ISL_1135903
EPI_ISL_1135905
EPI_ISL_1135906
EPI_ISL_1135908
EPI_ISL_1135910
EPI_ISL_1135914
EPI_ISL_1135915
EPI_ISL_1135919
EPI_ISL_1135920
EPI_ISL_1135923
EPI_ISL_1135924
EPI_ISL_1135927
EPI_ISL_1135928
EPI_ISL_1135930
EPI_ISL_1135932
EPI_ISL_1135938
EPI_ISL_1135939
EPI_ISL_1135940
EPI_ISL_1135941
EPI_ISL_1135942
EPI_ISL_1135944
EPI_ISL_1135947
EPI_ISL_1135948
EPI_ISL_1135949
EPI_ISL_1135950
EPI_ISL_1135956
EPI_ISL_1135965
EPI_ISL_1135967
EPI_ISL_1135969
EPI_ISL_1135970
EPI_ISL_1135975
EPI_ISL_1135978
EPI_ISL_1135979
EPI_ISL_1135981
EPI_ISL_1135984
EPI_ISL_1135985
EPI_ISL_1135986
EPI_ISL_1135989
EPI_ISL_1135993
EPI_ISL_1135994
EPI_ISL_1135997
EPI_ISL_1135998
EPI_ISL_1136002
EPI_ISL_1136004
EPI_ISL_1136007
EPI_ISL_1136008
EPI_ISL_1136014
EPI_ISL_1136052
EPI_ISL_1136053
EPI_ISL_1136054
EPI_ISL_1136058
EPI_ISL_1136059
EPI_ISL_1136060
EPI_ISL_1136061
EPI_ISL_1136062
EPI_ISL_1136063
EPI_ISL_1136247
EPI_ISL_1136248
EPI_ISL_1136249
EPI_ISL_1136250
EPI_ISL_1136251
EPI_ISL_1136253
EPI_ISL_1136254
EPI_ISL_1136255
EPI_ISL_1136256
EPI_ISL_1136257
EPI_ISL_1136258
EPI_ISL_1136259
EPI_ISL_1136260
EPI_ISL_1136261
EPI_ISL_1136262
EPI_ISL_1136263
EPI_ISL_1136264
EPI_ISL_1136265
EPI_ISL_1136266
EPI_ISL_1136267
EPI_ISL_1136268
EPI_ISL_1136269
EPI_ISL_1136270
EPI_ISL_1136271
EPI_ISL_1136272
EPI_ISL_1136273
EPI_ISL_1136274
EPI_ISL_1136275
EPI_ISL_1136276
EPI_ISL_1136277
EPI_ISL_1136278
EPI_ISL_1136279
EPI_ISL_1136280
EPI_ISL_1136281
EPI_ISL_1136282
EPI_ISL_1136283
EPI_ISL_1136284
EPI_ISL_1136285
EPI_ISL_1136286
EPI_ISL_1136287
EPI_ISL_1136288
EPI_ISL_1136289
EPI_ISL_1136290
EPI_ISL_1136291
EPI_ISL_1136292
EPI_ISL_1136294
EPI_ISL_1136295
EPI_ISL_1136296
EPI_ISL_1136297
EPI_ISL_1136298
EPI_ISL_1136299
EPI_ISL_1136300
EPI_ISL_1136301
EPI_ISL_1136302
EPI_ISL_1136303
EPI_ISL_1136304
EPI_ISL_1136305
EPI_ISL_1136306
EPI_ISL_1136307
EPI_ISL_1136307
EPI_ISL_1136308
EPI_ISL_1136309
EPI_ISL_1136310
EPI_ISL_1136311
EPI_ISL_1136312
EPI_ISL_1136313
EPI_ISL_1136314
EPI_ISL_1136315
EPI_ISL_1136316
EPI_ISL_1136317
EPI_ISL_1136318
EPI_ISL_1136319
EPI_ISL_1136320
EPI_ISL_1136321
EPI_ISL_1136322
EPI_ISL_1136323
EPI_ISL_1136324
EPI_ISL_1136325
EPI_ISL_1136326
EPI_ISL_1136327
EPI_ISL_1136328
EPI_ISL_1136329
EPI_ISL_1136330
EPI_ISL_1136331
EPI_ISL_1136332
EPI_ISL_1136333
EPI_ISL_1136334
EPI_ISL_1136335
EPI_ISL_1136336
EPI_ISL_1136337
EPI_ISL_1136338
EPI_ISL_1136339
EPI_ISL_1136340
EPI_ISL_1136342
EPI_ISL_1136343
EPI_ISL_1136344
EPI_ISL_1136345
EPI_ISL_1136346
EPI_ISL_1136347
EPI_ISL_1136348
EPI_ISL_1136349
EPI_ISL_1136350
EPI_ISL_1136351
EPI_ISL_1136353
EPI_ISL_1136354
EPI_ISL_1136355
EPI_ISL_1136356
EPI_ISL_1136357
EPI_ISL_1136358
EPI_ISL_1136359
EPI_ISL_1136360
EPI_ISL_1136361
EPI_ISL_1136363
EPI_ISL_1136364
EPI_ISL_1136365
EPI_ISL_1136366
EPI_ISL_1136367
EPI_ISL_1136368
EPI_ISL_1136369
EPI_ISL_1136370
EPI_ISL_1136371
EPI_ISL_1136373
EPI_ISL_1136374
EPI_ISL_1136375
EPI_ISL_1136376
EPI_ISL_1136377
EPI_ISL_1136378
EPI_ISL_1136379
EPI_ISL_1136380
EPI_ISL_1136381
EPI_ISL_1136382
EPI_ISL_1136383
EPI_ISL_1136384
EPI_ISL_1136385
EPI_ISL_1136386
EPI_ISL_1136387
EPI_ISL_1136388
EPI_ISL_1136389
EPI_ISL_1136390
EPI_ISL_1136391
EPI_ISL_1136392
EPI_ISL_1136396
EPI_ISL_1136399
EPI_ISL_1136402
EPI_ISL_1136403
EPI_ISL_1136404
EPI_ISL_1136405
EPI_ISL_1136406
EPI_ISL_1136407
EPI_ISL_1136410
EPI_ISL_1136411
EPI_ISL_1136413
EPI_ISL_1136418
EPI_ISL_1136424
EPI_ISL_1136425
EPI_ISL_1136427
EPI_ISL_1136428
EPI_ISL_1136430
EPI_ISL_1136436
EPI_ISL_1136438
EPI_ISL_1136439
EPI_ISL_1136440
EPI_ISL_1136441
EPI_ISL_1136442
EPI_ISL_1136444
EPI_ISL_1136445
EPI_ISL_1136449
EPI_ISL_1136450
EPI_ISL_1136451
EPI_ISL_1136455
EPI_ISL_1136456
EPI_ISL_1136457
EPI_ISL_1136458
EPI_ISL_1136459
EPI_ISL_1136460
EPI_ISL_1136464
EPI_ISL_1136479
EPI_ISL_1136482
EPI_ISL_1136485
EPI_ISL_1136486
EPI_ISL_1136487
EPI_ISL_1136489
EPI_ISL_1136490
EPI_ISL_1136491
EPI_ISL_1136493
EPI_ISL_1136494
EPI_ISL_1136499
EPI_ISL_1136500
EPI_ISL_1136501
EPI_ISL_1136502
EPI_ISL_1136503
EPI_ISL_1136504
EPI_ISL_1136519
EPI_ISL_1136537
EPI_ISL_1136538
EPI_ISL_1136539
EPI_ISL_1136540
EPI_ISL_1136541
EPI_ISL_1136543
EPI_ISL_1136544
EPI_ISL_1136547
EPI_ISL_1136550
EPI_ISL_1136551
EPI_ISL_1136552
EPI_ISL_1136567
EPI_ISL_1136568
EPI_ISL_1136578
EPI_ISL_1136579
EPI_ISL_1136580
EPI_ISL_1136581
EPI_ISL_1136582
EPI_ISL_1136589
EPI_ISL_1136590
EPI_ISL_1136592
EPI_ISL_1136593
EPI_ISL_1136594
EPI_ISL_1136596
EPI_ISL_1136602
EPI_ISL_1136603
EPI_ISL_1136604
EPI_ISL_1136605
EPI_ISL_1136606
EPI_ISL_1136607
EPI_ISL_1136608
EPI_ISL_1136610
EPI_ISL_1136611
EPI_ISL_1136616
EPI_ISL_1136617
EPI_ISL_1136618
EPI_ISL_1136622
EPI_ISL_1136623
EPI_ISL_1136624
EPI_ISL_1136625
EPI_ISL_1136626
EPI_ISL_1136627
EPI_ISL_1136628
EPI_ISL_1136629
EPI_ISL_1136631
EPI_ISL_1136632
EPI_ISL_1136633
EPI_ISL_1136634
EPI_ISL_1136635
EPI_ISL_1136636
EPI_ISL_1136637
EPI_ISL_1136638
EPI_ISL_1136648
EPI_ISL_1136649
EPI_ISL_1136650
EPI_ISL_1136651
EPI_ISL_1136652
EPI_ISL_1136674
EPI_ISL_1136675
EPI_ISL_1136676
EPI_ISL_1136677
EPI_ISL_1136679
EPI_ISL_1136680
EPI_ISL_1136681
EPI_ISL_1136682
EPI_ISL_1136685
EPI_ISL_1136687
EPI_ISL_1136688
EPI_ISL_1136689
EPI_ISL_1136723
EPI_ISL_1136724
EPI_ISL_1136725
EPI_ISL_1136726
EPI_ISL_1136727
EPI_ISL_1136731
EPI_ISL_1136733
EPI_ISL_1136734
EPI_ISL_1136735
EPI_ISL_1136736
EPI_ISL_1136737
EPI_ISL_1136738
EPI_ISL_1136739
EPI_ISL_1136742
EPI_ISL_1136746
EPI_ISL_1136747
EPI_ISL_1136748
EPI_ISL_1136755
EPI_ISL_1136756
EPI_ISL_1136757
EPI_ISL_1136758
EPI_ISL_1136759
EPI_ISL_1136760
EPI_ISL_1136761
EPI_ISL_1136762
EPI_ISL_1136763
EPI_ISL_1136764
EPI_ISL_1136765
EPI_ISL_1136766
EPI_ISL_1136771
EPI_ISL_1136772
EPI_ISL_1136774
EPI_ISL_1136775
EPI_ISL_1136776
EPI_ISL_1136788
EPI_ISL_1136790
EPI_ISL_1136791
EPI_ISL_1136792
EPI_ISL_1136795
EPI_ISL_1136796
EPI_ISL_1136797
EPI_ISL_1136802
EPI_ISL_1136803
EPI_ISL_1136804
EPI_ISL_1136805
EPI_ISL_1136806
EPI_ISL_1136807
EPI_ISL_1136808
EPI_ISL_1136809
EPI_ISL_1136810
EPI_ISL_1136811
EPI_ISL_1136816
EPI_ISL_1136817
EPI_ISL_1136819
EPI_ISL_1136820
EPI_ISL_1136821
EPI_ISL_1136823
EPI_ISL_1136833
EPI_ISL_1136835
EPI_ISL_1136838
EPI_ISL_1136839
EPI_ISL_1136840
EPI_ISL_1136841
EPI_ISL_1136842
EPI_ISL_1136843
EPI_ISL_1136844
EPI_ISL_1136845
EPI_ISL_1136846
EPI_ISL_1136847
EPI_ISL_1136848
EPI_ISL_1136849
EPI_ISL_1136851
EPI_ISL_1136852
EPI_ISL_1136853
EPI_ISL_1136854
EPI_ISL_1136858
EPI_ISL_1136859
EPI_ISL_1136861
EPI_ISL_1136862
EPI_ISL_1136863
EPI_ISL_1136864
EPI_ISL_1136865
EPI_ISL_1136866
EPI_ISL_1136867
EPI_ISL_1136868
EPI_ISL_1136869
EPI_ISL_1136870
EPI_ISL_1136871
EPI_ISL_1136872
EPI_ISL_1136873
EPI_ISL_1136874
EPI_ISL_1136875
EPI_ISL_1136878
EPI_ISL_1136879
EPI_ISL_1136880
EPI_ISL_1136881
EPI_ISL_1136889
EPI_ISL_1136891
EPI_ISL_1136895
EPI_ISL_1136898
EPI_ISL_1136899
EPI_ISL_1136900
EPI_ISL_1136901
EPI_ISL_1136902
EPI_ISL_1136904
EPI_ISL_1136905
EPI_ISL_1136908
EPI_ISL_1136909
EPI_ISL_1136910
EPI_ISL_1136911
EPI_ISL_1137302
EPI_ISL_1137303
EPI_ISL_1219807
EPI_ISL_1219820
EPI_ISL_1219829
EPI_ISL_1219865
EPI_ISL_1219866
EPI_ISL_1219867
EPI_ISL_1219869
EPI_ISL_1219901
EPI_ISL_1219905
EPI_ISL_1219906
EPI_ISL_1219907
EPI_ISL_1219908
EPI_ISL_1219909
EPI_ISL_1219910
EPI_ISL_1263103
EPI_ISL_1263104
EPI_ISL_1263105
EPI_ISL_1263110
EPI_ISL_1263151
EPI_ISL_1263152
EPI_ISL_1263153
EPI_ISL_1263154
EPI_ISL_1263155
EPI_ISL_1263156
EPI_ISL_1263158
EPI_ISL_1263159
EPI_ISL_1263160
EPI_ISL_1263161
EPI_ISL_1263162
EPI_ISL_1263163
EPI_ISL_1263164
EPI_ISL_1263165
EPI_ISL_1263166
EPI_ISL_1263167
EPI_ISL_1263168
EPI_ISL_1263169
EPI_ISL_1263170
EPI_ISL_1263171
EPI_ISL_1263172
EPI_ISL_1263173
EPI_ISL_1263175
EPI_ISL_1263176
EPI_ISL_1263177
EPI_ISL_1263178
EPI_ISL_1263179
EPI_ISL_1263180
EPI_ISL_1263181
EPI_ISL_1263182
EPI_ISL_1263183
EPI_ISL_1263184
EPI_ISL_1263185
EPI_ISL_1263186
EPI_ISL_1263187
EPI_ISL_1263188
EPI_ISL_1263189
EPI_ISL_1263190
EPI_ISL_1263191
EPI_ISL_1270787
EPI_ISL_1295902
EPI_ISL_1295904
EPI_ISL_1295905
EPI_ISL_1295907
EPI_ISL_1295908
EPI_ISL_1295911
EPI_ISL_1295913
EPI_ISL_1295914
EPI_ISL_1295915
EPI_ISL_1295916
EPI_ISL_1295917
EPI_ISL_1295918
EPI_ISL_1295919
EPI_ISL_1295920
EPI_ISL_1295922
EPI_ISL_1295923
EPI_ISL_1295924
EPI_ISL_1295925
EPI_ISL_1295926
EPI_ISL_1295927
EPI_ISL_1295928
EPI_ISL_1315092
EPI_ISL_1315093
EPI_ISL_1315108
EPI_ISL_1315109
EPI_ISL_1315110
EPI_ISL_1315111
EPI_ISL_1315112
EPI_ISL_1315113
EPI_ISL_1315114
EPI_ISL_1315115
EPI_ISL_1315116
EPI_ISL_1315117
EPI_ISL_1315118
EPI_ISL_1315119
EPI_ISL_1315120
EPI_ISL_1315121
EPI_ISL_1315122
EPI_ISL_1315123
EPI_ISL_1315124
EPI_ISL_1315125
EPI_ISL_1323639
EPI_ISL_1323640
EPI_ISL_1323641
EPI_ISL_1323642
EPI_ISL_1323643
EPI_ISL_1323644
EPI_ISL_1323645
EPI_ISL_1323646
EPI_ISL_1323647
EPI_ISL_1323648
EPI_ISL_1323649
EPI_ISL_1323650
EPI_ISL_1323651
EPI_ISL_1323652
EPI_ISL_1324786
EPI_ISL_1324787
EPI_ISL_1324788
EPI_ISL_1324789
EPI_ISL_1324790
EPI_ISL_1324791
EPI_ISL_1324792
EPI_ISL_1324793
EPI_ISL_1324794
EPI_ISL_1324795
EPI_ISL_1324796
EPI_ISL_1324797
EPI_ISL_1324798
EPI_ISL_1364431
EPI_ISL_1364434
EPI_ISL_1364435
EPI_ISL_1364443
EPI_ISL_1364444
EPI_ISL_1364445
EPI_ISL_1364446
EPI_ISL_1364447
EPI_ISL_1364448
EPI_ISL_1364449
EPI_ISL_1378664
EPI_ISL_1378665
EPI_ISL_1378666
EPI_ISL_1378668
EPI_ISL_1378669
EPI_ISL_1399165
EPI_ISL_1399166
EPI_ISL_1399167
EPI_ISL_1399168
EPI_ISL_1399169
EPI_ISL_1399170
EPI_ISL_1399171
EPI_ISL_1399172
EPI_ISL_1399173
EPI_ISL_1399174
EPI_ISL_1399175
EPI_ISL_1399176
EPI_ISL_1399177
EPI_ISL_1399178
EPI_ISL_1399179
EPI_ISL_1404604
EPI_ISL_1404605
EPI_ISL_1404606
EPI_ISL_1404607
EPI_ISL_1404608
EPI_ISL_1404609
EPI_ISL_1404610
EPI_ISL_1404611
EPI_ISL_1404612
EPI_ISL_1404613
EPI_ISL_1423001
EPI_ISL_1423002
EPI_ISL_1423003
EPI_ISL_1423004
EPI_ISL_1423005
EPI_ISL_1469498
EPI_ISL_1469499
EPI_ISL_1469500
EPI_ISL_1469501
EPI_ISL_1469502
EPI_ISL_1469503
EPI_ISL_1469504
EPI_ISL_1469505
EPI_ISL_1469506
EPI_ISL_1469507
EPI_ISL_1469508
EPI_ISL_1469509
EPI_ISL_1469510
EPI_ISL_1469511
EPI_ISL_1469512
EPI_ISL_1469513
EPI_ISL_1469514
EPI_ISL_1469515
EPI_ISL_1469516
EPI_ISL_1469517
EPI_ISL_1469518
EPI_ISL_1469519
EPI_ISL_1469520
EPI_ISL_1469521
EPI_ISL_1469522
EPI_ISL_1469523
EPI_ISL_1469524
EPI_ISL_1469525
EPI_ISL_1469526
EPI_ISL_1469528
EPI_ISL_1469530
EPI_ISL_1469531
EPI_ISL_1469532
EPI_ISL_1469533
EPI_ISL_1469534
EPI_ISL_1469535
EPI_ISL_1469536
EPI_ISL_1469537
EPI_ISL_1469538
EPI_ISL_1469539
EPI_ISL_1469545
EPI_ISL_1483257
EPI_ISL_1483258
EPI_ISL_1483259
EPI_ISL_1483266
EPI_ISL_1483267
EPI_ISL_1483268
EPI_ISL_1483269
EPI_ISL_1483270
EPI_ISL_1483271
EPI_ISL_1483272
EPI_ISL_1483273
EPI_ISL_1483274
EPI_ISL_1483275
EPI_ISL_1483276
EPI_ISL_1483277
EPI_ISL_1483278
EPI_ISL_1493146
EPI_ISL_1493147
EPI_ISL_1493148
EPI_ISL_1493149
EPI_ISL_1493150
EPI_ISL_1493151
EPI_ISL_1493152
EPI_ISL_1493153
EPI_ISL_1493154
EPI_ISL_1493155
EPI_ISL_1493156
EPI_ISL_1493157
EPI_ISL_1493158
EPI_ISL_1493160
EPI_ISL_1493161
EPI_ISL_1493162
EPI_ISL_1493163
EPI_ISL_1493164
EPI_ISL_1501680
EPI_ISL_1501681
EPI_ISL_1501682
EPI_ISL_1511637
EPI_ISL_1511638
EPI_ISL_1511639
EPI_ISL_1575284
EPI_ISL_1575285
EPI_ISL_1575286
EPI_ISL_1575287
EPI_ISL_1575288
EPI_ISL_1575289
EPI_ISL_1575290
EPI_ISL_1663903
EPI_ISL_1663904
EPI_ISL_1663905
EPI_ISL_1663906
EPI_ISL_1663907
EPI_ISL_1663908
EPI_ISL_1663909
EPI_ISL_1663910
EPI_ISL_1675149
EPI_ISL_1822611
EPI_ISL_1822613
EPI_ISL_1822614
EPI_ISL_1822615
EPI_ISL_1822616
EPI_ISL_1822617
EPI_ISL_1822618
EPI_ISL_1822620
EPI_ISL_1822622
EPI_ISL_1822624
EPI_ISL_1961036
EPI_ISL_1961037
EPI_ISL_1961038
EPI_ISL_1961039
EPI_ISL_1961040
EPI_ISL_1961041
EPI_ISL_1961042
EPI_ISL_1961043
EPI_ISL_1961044
EPI_ISL_1961045
EPI_ISL_2032397
EPI_ISL_2032399
EPI_ISL_2032401
EPI_ISL_2032403
EPI_ISL_2032405
EPI_ISL_2032407
EPI_ISL_2032410
EPI_ISL_2032412
EPI_ISL_2032414
EPI_ISL_2032416
EPI_ISL_2032418
EPI_ISL_2032422
EPI_ISL_2032424
EPI_ISL_2032427
EPI_ISL_2032429
EPI_ISL_2032431
EPI_ISL_2032433
EPI_ISL_2032435
EPI_ISL_2032437
EPI_ISL_2211083
EPI_ISL_2211086
EPI_ISL_2211088
EPI_ISL_2211091
EPI_ISL_2211096
EPI_ISL_2211103
EPI_ISL_2211110
EPI_ISL_2211116
EPI_ISL_2211118
EPI_ISL_2211123
EPI_ISL_2308352
EPI_ISL_2991999
EPI_ISL_2992024
EPI_ISL_2992031
EPI_ISL_2992033
EPI_ISL_2992037
EPI_ISL_2992038
EPI_ISL_2992039
EPI_ISL_2992040
EPI_ISL_2992041
EPI_ISL_3760874
EPI_ISL_4877378
EPI_ISL_4877379
EPI_ISL_4877389
EPI_ISL_4877395
EPI_ISL_4877396
EPI_ISL_4877397
EPI_ISL_4877398
EPI_ISL_4877399
EPI_ISL_4877416
EPI_ISL_4877417
EPI_ISL_4877418
EPI_ISL_4877419
EPI_ISL_4877420
EPI_ISL_4877421
EPI_ISL_4877422
EPI_ISL_4877423
EPI_ISL_4877424
EPI_ISL_4877426
EPI_ISL_4877427
EPI_ISL_4877428
EPI_ISL_4877429
EPI_ISL_4877430
EPI_ISL_4877431
EPI_ISL_4877432
EPI_ISL_4877434
EPI_ISL_4877800
EPI_ISL_4877848
EPI_ISL_4877852
EPI_ISL_4877856
EPI_ISL_4877861
EPI_ISL_4877881
EPI_ISL_4877938
EPI_ISL_4877961
EPI_ISL_4878084
EPI_ISL_4878085
EPI_ISL_4878167
EPI_ISL_4878169
EPI_ISL_4878170
EPI_ISL_4878172
EPI_ISL_4878179
EPI_ISL_4878190
EPI_ISL_4878204
EPI_ISL_5530707
EPI_ISL_5530695
EPI_ISL_5530708
EPI_ISL_5530696
EPI_ISL_5531677
EPI_ISL_5531783
EPI_ISL_5530692
EPI_ISL_5530899
EPI_ISL_5531662
EPI_ISL_5530697
EPI_ISL_5530914
EPI_ISL_5531665
EPI_ISL_5530710
EPI_ISL_5531372
EPI_ISL_5530701
EPI_ISL_5530905
EPI_ISL_5531357
EPI_ISL_5530906
EPI_ISL_5531595
EPI_ISL_5531596
EPI_ISL_5530907
EPI_ISL_5531594
EPI_ISL_5530712
EPI_ISL_5531632
EPI_ISL_5531597
EPI_ISL_5531523
EPI_ISL_5531602
EPI_ISL_5531601
EPI_ISL_1378670
EPI_ISL_5531545
EPI_ISL_5531600
EPI_ISL_1404589
EPI_ISL_1364433
EPI_ISL_1469541
EPI_ISL_1469542
EPI_ISL_1469540
EPI_ISL_1378672
EPI_ISL_1378671
EPI_ISL_1501676
EPI_ISL_1378644
EPI_ISL_1378645
EPI_ISL_1399162
EPI_ISL_1399163
EPI_ISL_5531644
EPI_ISL_1404598
EPI_ISL_1404599
EPI_ISL_1404600
EPI_ISL_1423007
EPI_ISL_1423006
EPI_ISL_1422992
EPI_ISL_5531544
EPI_ISL_5531546
EPI_ISL_1422993
EPI_ISL_1422994
EPI_ISL_1422995
EPI_ISL_1422996
EPI_ISL_1422997
EPI_ISL_1422998
EPI_ISL_1422999
EPI_ISL_1423000
EPI_ISL_1469493
EPI_ISL_1469545
EPI_ISL_1469547
EPI_ISL_1469546
EPI_ISL_1469544
EPI_ISL_1469543
EPI_ISL_1469495
EPI_ISL_5531603
EPI_ISL_1469496
EPI_ISL_1627471
EPI_ISL_1501683
EPI_ISL_1483253
EPI_ISL_1483254
EPI_ISL_1483255
EPI_ISL_1501675
EPI_ISL_5531549
EPI_ISL_5531605
EPI_ISL_1501677
EPI_ISL_1501678
EPI_ISL_5530682
EPI_ISL_5531604
EPI_ISL_1511631
EPI_ISL_4877438
EPI_ISL_1511632
EPI_ISL_1511633
EPI_ISL_5530702
EPI_ISL_1575294
EPI_ISL_1575292
EPI_ISL_1575291
EPI_ISL_1575293
EPI_ISL_1575253
EPI_ISL_1575256
EPI_ISL_1575257
EPI_ISL_4877886
EPI_ISL_1575258
EPI_ISL_5531606
EPI_ISL_1575283
EPI_ISL_1575262
EPI_ISL_1575282
EPI_ISL_1575259
EPI_ISL_1575260
EPI_ISL_1585920
EPI_ISL_1620636
EPI_ISL_1620637
EPI_ISL_2992004
EPI_ISL_1675159
EPI_ISL_1663881
EPI_ISL_5531683
EPI_ISL_5531609
EPI_ISL_1675161
EPI_ISL_1675160
EPI_ISL_5531540
EPI_ISL_5531588
EPI_ISL_5531791
EPI_ISL_1675162
EPI_ISL_5531610
EPI_ISL_1675152
EPI_ISL_1675153
EPI_ISL_5531518
EPI_ISL_1675154
EPI_ISL_5531817
EPI_ISL_2992042
EPI_ISL_5531611
EPI_ISL_5531664
EPI_ISL_5531551
EPI_ISL_5531666
EPI_ISL_5531589
EPI_ISL_5531787
EPI_ISL_2211125
EPI_ISL_5531647
EPI_ISL_5531633
EPI_ISL_5531492
EPI_ISL_5531634
EPI_ISL_5531653
EPI_ISL_5531615
EPI_ISL_5531614
EPI_ISL_4877796
EPI_ISL_2566121
EPI_ISL_2566122
EPI_ISL_5530719
EPI_ISL_5531966
EPI_ISL_2992019
EPI_ISL_4877698
EPI_ISL_4877699
EPI_ISL_5531636
EPI_ISL_5531635
EPI_ISL_4878081
EPI_ISL_5531557
EPI_ISL_4878109
EPI_ISL_2612503
EPI_ISL_5531538
EPI_ISL_4877964
EPI_ISL_5531638
EPI_ISL_2612501
EPI_ISL_2612504
EPI_ISL_4877891
EPI_ISL_4877892
EPI_ISL_4877893
EPI_ISL_4877894
EPI_ISL_4877895
EPI_ISL_4877899
EPI_ISL_5530725
EPI_ISL_5530939
EPI_ISL_5530724
EPI_ISL_5531381
EPI_ISL_5530723
EPI_ISL_5531094
EPI_ISL_5531961
EPI_ISL_5531668
EPI_ISL_2690274
EPI_ISL_2690277
EPI_ISL_5531102
EPI_ISL_2690278
EPI_ISL_2690279
EPI_ISL_2690273
EPI_ISL_5530726
EPI_ISL_2690275
EPI_ISL_5531495
EPI_ISL_4877896
EPI_ISL_5531617
EPI_ISL_2690282
EPI_ISL_2690283
EPI_ISL_4877897
EPI_ISL_4878121
EPI_ISL_4877445
EPI_ISL_5530729
EPI_ISL_5530728
EPI_ISL_5530731
EPI_ISL_5530736
EPI_ISL_5530969
EPI_ISL_5531618
EPI_ISL_5530737
EPI_ISL_5531642
EPI_ISL_5531643
EPI_ISL_5530705
EPI_ISL_2801516
EPI_ISL_2801479
EPI_ISL_2801518
EPI_ISL_5531470
EPI_ISL_2801519
EPI_ISL_2801520
EPI_ISL_2801495
EPI_ISL_2801508
EPI_ISL_5531107
EPI_ISL_5530738
EPI_ISL_2801521
EPI_ISL_2801483

## Sheet: Table S2
Sample Date	Sample Location	Ct		Average Concentration (gc/L)
		N1	N2	N1	N2
November 2020	(1) Pooled, samples from three facilities	30.31-35.67	30.25-35.75	163416	163097
2021-01-01	(2) TMWRF Sewershed	35.3	33.19	72505	143398
2021-01-10	(3) TMWRF-Reno interceptor	36.57	36.35	38456.6	53370.3
2021-01-29	(4) STMWRF sewershed	36.93	40.97	67001	20394
2021-03-11	TMWRF Sewershed	35.57	35.03	139150	257841
2021-03-18	TMWRF Sewershed	36.75	36.88	54283.4	44184.4
2021-06-20	TMWRF Sewershed		36.15		30798.5
Note:	(1) Pooled samples: Total RNA were extracted from the wastewater sampels that collected from TMWRF, STMWRF, and RSWRF, and then mixed together for sequencing
	(2) TMWRF: Truckee Meadows Water Reclamation Facility
	(3) TMWRF-Reno interceptor: Wastewater were collected from Reno sewer network, and then received in TMWRF
	(4) STMWRF: South Truckee Meadows Water Reclamation Facility

## Sheet: Table S3
Supplemental Table 1-June 2021
Chromosome	Region	Type	Reference	Alleles (Count/Coverage)	Length	Non-synonymous	Gene	1st predominant signature (% Freqeuency)	Associated variants (1st)	2nd predominant signature (% Frequency)	Associated variants (2nd)	3rd signature (% Frequency)	Associated variants (3rd)	Signatures in Variants Being Monitored	Note
MN908947.3	1104	SNV	T	T (8/15), C (7/15)	1	Yes	ORF1a	1104T: I280-wt (53%)	all others	1104T>C: I280T (47%)	some 21A (Delta)				Not an unique signature
MN908947.3	3267	SNV	C	T ( 9/16), C (7/16)	1	Yes	ORF1a	3267C>T: T1001I (56%)	20I (Alpha)	3267C: T1001-wt (44%)	all other variants			B.1.1.7
MN908947.3	5284	SNV	C	T (10/19), C (9/19)	1	No	ORF1a	5284C>T (53%)	20I (Alpha)	5284C-wt (47%)	all other variants				Not an unique signature
MN908947.3	5388	SNV	C	A (16/19), C (3/19)	1	Yes	ORF1a	5388C>A: A1708D (84%)	20I (Alpha)	5388C: A1708-wt (16%)	all other variants			B.1.1.7
MN908947.3	18877	SNV	C	T (623/645), C (22/645)	1	No	ORF1a	18877C>T (97%)	21H	18877C-wt (3%)	all other variants				Not an unique signature
MN908947.3	21987	SNV	G	A (554/613), G (40/613), T (19/613)	1	Yes	S	21987G>A: G142D (90%)	Primarily 21A (Delta) and some 20I (Alpha)	21987G: G142-wt (7%)	all other variants	21987G>T: G142V (3%)	Some 20I (Alpha)		Not an unique signature
MN908947.3	22029..22034	Deletion	AGTTCA	Deletion-: (785/838)	6	Yes	S	22029..22034: E156_R158delinsG (93%)	21A (Delta)	22029..22034-wt (7%)	all other variants			B.1.617.2
MN908947.3	23012	SNV	G	A (585/593), G (8/593)	1	Yes	S	23012G>A: E484K (98%)	Beta, Gamma, Kappa and 20B	23012G: E484-wt (2%)	all other variants			B.1.1.7, B.1.351, P.1, B.1.526
MN908947.3	23403	SNV	A	G (42/44), A (2/44)	1	Yes	S	23403A>G: D614G (95%)	almost all variants	23403A: D614-wt (5%)	19A/19B and some Alpha				Not an unique signature
MN908947.3	23416	SNV	A	T (38/63), A (25/63)	1	No	S	23416A>T (60%)	20E and 20I (Alpha)	23416A-wt (40%)	all other variants				Not an unique signature
MN908947.3	25352	SNV	G	T (27/39), G (12/39)	1	Yes	S	25352G>T: V1264L (69%)	some 21A (Delta)	25352G: V1264-wt (31%)	all other variants				Not an unique signature
MN908947.3	25469	SNV	C	T (43/50), C 7/50)	1	Yes	ORF3a	25469C>T: S26L (86%)	21A (Delta)	25469C: S26-wt (14%)	all other variants			B.1.617.2
MN908947.3	26767	SNV	T	C (364/377), T 13/377)	1	Yes	M	26767T>C: I82T (97%)	21A (Delta), Epsilon, 20F	26767T: I82-wt (3%)	all other variants			B.1.617.2
MN908947.3	27972	SNV	C	C 11/17), T (6/17)	1	Yes	ORF8	27972C: Q27 (65%)	all others	27972C>T: Q27* (35%)	20I (Alpha)			B.1.1.7
MN908947.3	28271	Deletion	A	Deletion-: (7/11), A (3/11), G (1/11)	1	-		28271A>Deletion-: 63%	21A (Delta) and 20I (Alpha)	28271A-wt (27%)	all other variants	28271A>G (9%)	20F	B.1.617.2, B.1.617.1
MN908947.3	28881..28883	MNV	GGG	AAC (8/10), GGG (2/10)	3	Yes	N	28881-28883GGG>AAC: R203_G204>203K_204R (80%)	20B, 20D, 20E (Theta), 20F, 20G (Lambda), 20I (Alpha), 20J (Gamma)	28881-28883GGG: R203_G204 (20%)	all other variants				Not an unique signature
MN908947.3	28977	SNV	C	T (8/12), C (4/12)	1	Yes	N	28977C>T: S235F (66%)	20I (Alpha)	28977C: S235 (33%)	all other variants			B.1.1.7
MN908947.3	29735	SNV	A	C (5811/5850), T (20/5850), A (14/5850)	1	-		29735A>C (99%)	Not found	29735A>T (0.3%)	Not found	29735A-wt (0.2%)	All variants		Deleted in some 21B
MN908947.3	29758	SNV	T	G (8296/8328), T (22/8328)	1			29758T>G (99%)	None	29758T-wt (0.25%)	All variants				Deleted in some 21B

## Sheet: Table S4
Supplemental Table 2-March 2021
Chromosome	Region	Type	Reference	Alleles (Count/Coverage)	Length	Non-synonymous	Gene	1st predominant signature (% Freqeuency)	Associated variants (1st)	2nd predominant signature (% Frequency)	Associated variants (2nd)	3rd signature (% Frequency)	Associated variants (3rd)	Signatures in Variants Being Monitored	Note
MN908947.3	3078	SNV	A	C (69/69)	1	Yes	ORF1a	3078A>C: E938A (100%)	Not Reported						E938K is in some 20A
MN908947.3	3467	SNV	G	T (23/23)	1	Yes	ORF1a	3467G>T: G1068* (100%)	Not Reported						G1068V is in some 20J
MN908947.3	3939	SNV	G	T (10/10)	1	Yes	ORF1a	3939G>T: R1225I	Some 20I (Alpha)						Not an unique signature
MN908947.3	4815	SNV	C	T (15/15)	1	Yes	ORF1a	4815C>T: S1517F (100%)	Some 20A
MN908947.3	8516	SNV	G	A (32/32)	1	Yes	ORF1a	8516G>A:V2751I (100%)	Not Reported						V2751F is in some 20I (Alpha)
MN908947.3	9072	SNV	C	T (48/48)	1	Yes	ORF1a	9072C>T: T2936I (100%)	20B						Present in B.1.1.318 lineage
MN908947.3	9891	SNV	C	T (32/32)	1	Yes	ORF1a	9891C>T: A3209V (100%)	21A (Delta), 20B and 20C					B.1.617.2, B.1.1.318	Present in B.1.1.318 and B.1.526
MN908947.3	10116	SNV	C	T (24/25), C (1/25)	1	Yes	ORF1a	10116C>T: T3284I (96%)	20B	10116C: T3284 (4%)				B.1.1.318	Present in B.1.1.318 lineage
MN908947.3	11478	SNV	T	A (36/69), T 33/69)	1	Yes	ORF1a	11478A>T: I3738N 52%)	Not Reported	11478A: I3738-wt (48%)	All variants
MN908947.3	14228	SNV	A	T (43/43)	1	Yes	ORF1b	14228A>T: L254M (100%)	Not Reported
MN908947.3	14408	SNV	C	T (47/47)	1	Yes	ORF1b	14408C>T: P314L (100%)	All variants 20A onwards
MN908947.3	21646	SNV	C	T (37/37)	1	No	S	21646 C>T (100%)	Some 20I (Alpha)
MN908947.3	23012	SNV	G	A (36/36)	1	Yes	S	23012G>A:E484K (100%)	20H (Beta), 20J (Gamma), 21D (Eta), 21F (Iota)					P.1, B.1.351
MN908947.3	23403	SNV	A	G (30/30)	1	Yes	S	23403A>G: D614G (100%)	almost all variants
MN908947.3	23604	SNV	C	A (40/40)	1	Yes	S	23604C>A: P681H (100%)	20A, 20B, 20I (Alpha)					B.1.1.7
MN908947.3	24382	SNV	C	T (15/15)	1	No	S	24382C>T (100%)	20B					B.1.1.318	Present in B.1.1.318 lineage
MN908947.3	26767	SNV	T	C (56/56)	1	Yes	M	26767T>C: L82T (100%)	21A (Delta), 21D (Eta)					B.1.617.2
MN908947.3	27143	SNV	C	T (40/40)	1	No	M	27143C>T (100%)	some 20H and 20B
MN908947.3	27996	SNV	G	T (30/30)	1	Yes	ORF8	27996G>T: D35Y (100%)	21D (Eta)
MN908947.3	28209	SNV	G	T (70/71)	1	Yes	ORF8	28209G>T: E106* (100%)	20I (Alpha)					B.1.1.7
MN908947.3	28271	SNV	A	G (45/45)	1	-		28271A>G (100%)	Some 20I (Alpha)					B.1.1.7
MN908947.3	28881..28883	MNV	GGG	AAC 60/60)	3	Yes	N	28881-28883GGG>AAC: R203_G204>203K_204R (100%)	20B, 20D, 20E (Theta), 20F, 20G (Lambda), 20I (Alpha), 20J (Gamma)					B.1.1.7
MN908947.3	28896..28898	Deletion	CTA	Deletion (60/60)	3	Yes	N	28881..28883: A208_R209delinsG (100%)	20B					B.1.1.318	Present in B.1.1.318 lineage
MN908947.3	29769	SNV	C	T (64/64)	1	-		29769C>T (100%)	20B					B.1.1.318	Present in B.1.1.318 lineage

## Sheet: Table S5
				Supplementary Table 3-Jan.2021
Chromosome	Region	Type	Reference	Alleles (Count/Coverage)	Length	Non-synonymous	Gene	1st predominant signature (% Freqeuency)	Associated variants (1st)	2nd predominant signature (% Frequency)	Associated variants (2nd)	3rd signature (% Frequency)	Associated variants (3rd)	Signatures in Variants Being Monitored	Note
MN908947.3	241	SNV	C	T (331/331)	1	-		241 C>T (100%)	All 20A onwards						Not an unique signature
MN908947.3	835	SNV	C	T (3982/4305), C (309/4305)	1	No	ORF1a	835C>T: F190-wt (93%)	some 20B, 20G and 21D	835C: F190-wt (7%)	All variants				Not an unique signature
MN908947.3	1059	SNV	C	T (3742/3745), A (3/3745)	1	Yes	ORF1a	1059C>T: T265I (99.9%)	20A, 20C, 20G, 21C, 21F and 20H	1059C>A: T265N (0.07%)	Not reported			B.1.427/429 (Epsilon), 21F (Iota)
MN908947.3	2647	SNV	A	G (600/1437), A (836/1437)	1	No	ORF1a	2647A: K794-wt (58%)	All variants	2647A>G: K794 (42%)	20D				Not an unique signature
MN908947.3	2649	SNV	A	G (598/1432), A (831/1432), T (3/1432)	1	Yes	ORF1a	2649A: D795-wt (58%)	All variants	2649A>G: D795G (41.8%)	some 20I (Alpha)	2649A>T: D795V (0.2%)	Not Reported		D795N present in some 21A (Delta)
MN908947.3	3037	SNV	C	T (21/22), C 91/22)	1	No	ORF1a	3037C>T (95%)	All 20A onwards	3037C-wt (5%)	19A and 19B
MN908947.3	9426	SNV	C	T (1040/1328), C (288/1328)	1	Yes	ORF1a	9426C>T: A3054V (78%)	Not Reported	9426C: A3054-wt (22%)	all variants
MN908947.3	12100	SNV	C	T (215/297), C (82/297)	1	No	ORF1a	12100C>T (72%)	21C (Epsilon)	12100C-wt (28%)	all other variants			B.1.427/429 (Epsilon)
MN908947.3	12878	SNV	A	G (713/777), A (64/777)	1	Yes	ORF1a	12787A>G: I4205V (91.6%)	21C (Epsilon)	12787A: I4205-wt (8.4%)	all other variants			B.1.427/429 (Epsilon)
MN908947.3	13261	SNV	C	T (3778/5273), C (1478/5273), A (17/5273)	1	No	ORF1a	13261C>T (71.6%)	some 20G, 21A and 20I	13261C-wt (28%)	All variants	13261C>A: C4332*(0.3%)			Not an unique signature
MN908947.3	14408	SNV	C	T (1022/1026), C (2/1026), A (2/1026)	1	Yes	ORF1b	14408C>T: P314L (99.6%)	All variants 20A onwards	14408C>A: P314H (0.2%)	some 20H variants	14408C: P314-wt (0.2%)	19A and 19B		Not an unique signature
MN908947.3	19390	SNV	C	T (201/257), A (57/257)	1	Yes	ORF1b	19390C>T: P1975S (78%)	some 20I (Alpha)	19390C: P1975-wt (22%)	All variants				Not an unique signature
MN908947.3	22917	SNV	T	G (178/252), T (73/252), A (1/252)	1	Yes	S	22917T>G:L452R (70.6%)	Cal.20C, 21A (Delta), 21B (Kappa)	22917T:L452-wt (29%)	all other variants	22917T>A:L452Q (0.4%)	21G (Lambda)	B.1.526 (Iota), B.1.427, B.1.429, B.1.617.1 (Kappa), B.1.617.3, and the lineages and sub-lineages designated Delta (B.1.617.2, AY.1, AY.2, and AY.3)
MN908947.3	23403	SNV	A	G (1385/1387), A (2/1387)	1	Yes	S	23403A>G: D614G (99.7%)	almost all variants	23403A: D614-wt (0.14%)					Not an unique signature
MN908947.3	24134	SNV	C	T (387/412), C (25/412)	1	Yes	S	24134C>T: L858F (94%)	some 20B	24134C: L858-wt (6%)	All variants				Not an unique signature
MN908947.3	25563	SNV	G	T (128/128)	1	Yes	ORF3a	25563G>T: Q57H (100%)	20C, 20G, 20H, 21C and 21F					B.1.526 (Iota), B.1.427, B.1.429,
MN908947.3	25907	SNV	G	T (6822/6857), A (28/6857), G (7/6857)	1	Yes	ORF3a	25907G>T: G172V (99.5%)	20G	25907G>A: G172D (0.4%)	19A	25907G: G172-wt (0.1%)	All variants
MN908947.3	27964	SNV	C	T (6916/7681), C (765/7681)	1	Yes	ORF8	27964C>T: S24L (90%)	20G	27964C: S24-wt (10%)	all other variants
MN908947.3	28472	SNV	C	T (2713/3793), C (1079/3793)	1	Yes	N	28472C>T: P67S (71.4%)	20G	28472C: P67-wt (28.4%)	all other variants
MN908947.3	28869	SNV	C	T (1015/1332), C (315/1332), A (2/1332)	1	Yes	N	28869C>T: P199L (76.2%)	21F and 21C (Epsilon)	28869C: P199-wt (23.6%)	all other variants	28869C>A: P199Q (0.15%)	20B
MN908947.3	29362	SNV	C	T (123/126), C (3/126)	1	No	N	29362C>T (97.6%)	21C (Epsilon)	29362C-wt (2.4%)	all other variants

## Sheet: Table S6
Supplementary Table 4-Nov.2020
Chromosome	Region	Type	Reference	Alleles (Count/Coverage)	Length	Non-synonymous	Gene	1st predominant signature (% Freqeuency)	Associated variants (1st)	2nd predominant signature (% Frequency)	Associated variants (2nd)	3rd signature (% Frequency)	Associated variants (3rd)	Signatures in Variants Being Monitored	Note
MN908947.3	10560	SNV	C	T (3738/4659), C 912/4659), A (9/4659)	1	Yes	ORF1a	10560C>T: T3432I (80%)	Not Reported	10560C: T3432-wt (19%)	All variants	10560C>A: T3432N (0.2%)	Not Reported		T3432* in few 21A (Delta)
MN908947.3	10563	SNV	G	T (3744/4611), G (863/4611), A 3/4611)	1	Yes	ORF1a	10563G>T: G3433V (81%)	Not Reported	10563G: G3433-wt (18%)	All variants	10563G>A: G3433E (0.07%)	Not Reported		T3433* in few 21A (Delta)
MN908947.3	12513	SNV	C	T (14/14)	1	Yes	ORF1a	12513C>T: T4083M (100%)	many variants, 20C, 20G and 20I
MN908947.3	14333	SNV	G	A (3083/3691), G (606/3691)	1	Yes	ORF1b	14333G>A: C289T (83.5%)	Not Reported	14333G: C289-wt (16.4%)	All variants
MN908947.3	14408	SNV	C	T (15901/15955), A (34/15955), C (19/15955)	1	Yes	ORF1b	14408C>T: P314L (99.6%)	All variants 20A onwards	14408C>A: P314H (0.2%)	some 20H variants	14408C: P314-wt (0.12%)	19A and 19B		Not an unique signature
MN908947.3	21595	SNV	C	T (2660/2663), C (3/2663)	1	No	S	21595C>T (99.9%)	some variants of 20C, 20G and 20I	21595C-wt (0.1%)	All variants			B.1.1.7	Not an unique signature
MN908947.3	21707	SNV	C	T (1890/1892), A (2/1890)	1	Yes	S	21707C>T: H49Y (99.9%)	some variants of 20B, 20G and 20I	21707C>A: H49N (0.1%)	Not Reported			B.1.1.7	Not an unique signature
MN908947.3	23403	SNV	A	G 61498/61653), A (119/61653)	1	Yes	S	23403A>G: D614G (99.7%)	almost all variants	23403A: D614-wt (0.2%)	19A and 19B				Not an unique signature
MN908947.3	23426	SNV	G	T (63326/63816), G (415/63816), A (45/63816)	1	Yes	S	23426G>T: V622F (99.2%)	some 19B and 20D, 20I	23426G: V622-wt (0.6%)	All variants	23426G>A: V622I (0.1%)	some 20C	B.1.1.7	Not an unique signature
MN908947.3	28019	SNV	T	C (86/111), T (25/111)	1	No	ORF8	28019T>C (77%)	Some 20B	28019T-wt (23%)	All variants				Not an unique signature
